# Supplementary material for: Assessment of the Phytotoxicity of Metal Oxide Nanoparticles on Two Crop Plants, Maize (Zea mays L.) and Rice (Oryza sativa L.)
Source: PubMed Central journal article supplement (PMC4690899; doi:10.3390/ijerph121214963), 2015-11-30
Supplement: ijerph-12-14963-s001.pdf [file ijerph-12-14963-s001.pdf]

## Assessment of Phytotoxicity of Metal Oxide Nanoparticles on Two Crop Plants, Maize (*Zea Mays* L.) and Rice (*Oryza Sativa* L.)

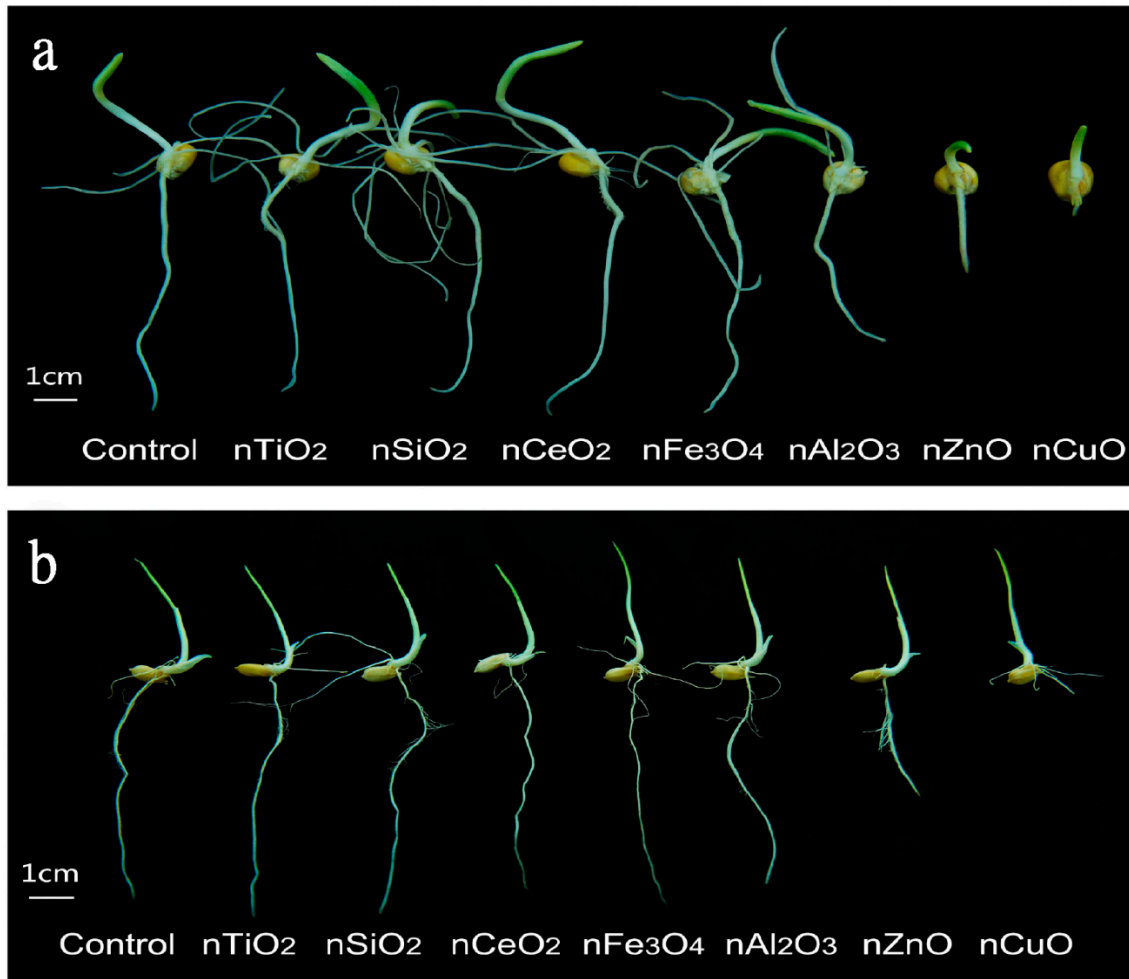

**Figure S1.** (a) Phenotype of maize seeds incubated 5 days with seven metal oxide NPs suspensions at 2000 mg·L<sup>-1</sup> and without NPs. (b) Phenotype of rice seeds incubated 7 days with seven metal oxide NPs suspensions at 2000 mg·L<sup>-1</sup> and without NPs.

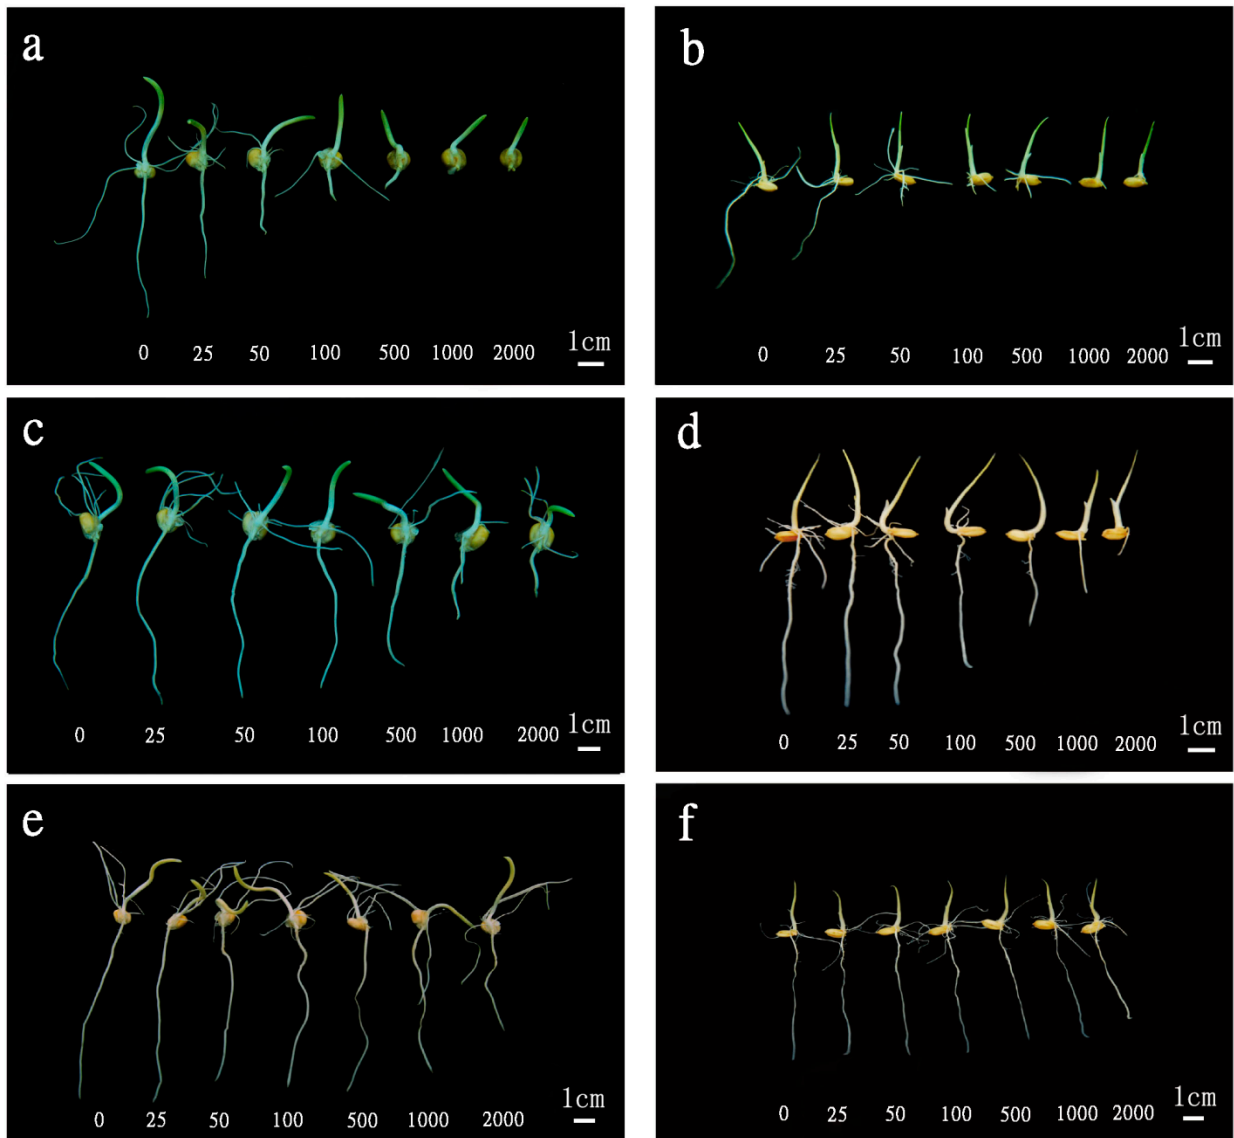

**Figure S2.** Phenotype of crop seeds during the germination process: (a) maize seeds (5 days) and (b) rice seeds (7 days) exposed with 0–2000  $\text{mg}\cdot\text{L}^{-1}$  nCuO; (c) maize seeds (5 days) and (d) rice seeds (7 days) exposed with 0–2000  $\text{mg}\cdot\text{L}^{-1}$  nZnO; (e) maize seeds (5 days) and (f) rice seeds (7 days) exposed with 0–2000  $\text{mg}\cdot\text{L}^{-1}$  nAl<sub>2</sub>O<sub>3</sub>.

© 2015 by the authors; licensee MDPI, Basel, Switzerland. This article is an open access article distributed under the terms and conditions of the Creative Commons Attribution license (<http://creativecommons.org/licenses/by/4.0/>).
